# Supplementary material for: Towards a Definition of Harmless Nanoparticles from an Environmental and Safety Perspective
Source: Hindawi journal article supplement (doi:10.1155/2016/8608567), 2016-01-01
Supplement: f1 [file 8608567.f1.pdf]

## Supplemental Table

Supplemental Table 1. Toxicity of NPs to different organisms.

| NPs              | Advertised particle size (nm) | TEM/SEM measured size (nm) | DLS (nm) | Zeta potential (mV)    | Test species                                                                | Effects                                                                       | Reference |
|------------------|-------------------------------|----------------------------|----------|------------------------|-----------------------------------------------------------------------------|-------------------------------------------------------------------------------|-----------|
| TiO <sub>2</sub> | 25                            | N/A                        | N/A      | N/A                    | green algae                                                                 | EC <sub>50</sub> = 44 mg/L                                                    | 1         |
|                  | 100                           | N/A                        | N/A      | N/A                    | <i>D. subspicatus</i>                                                       | EC <sub>50</sub> was beyond the tested range, > 50 mg/L                       | 1         |
|                  | 25-70                         | N/A                        | N/A      | N/A                    | algae <i>P. subcapitata</i>                                                 | EC <sub>50</sub> = 5.83 mg Ti/L                                               | 2         |
|                  | 25-70                         | N/A                        | N/A      | N/A                    | <i>S. cerevisiae</i> S288C                                                  | not toxic even at 20000 mg/L                                                  | 3         |
|                  | N/A                           | 17-64                      | N/A      | N/A                    | <i>E. coli</i>                                                              | LC <sub>50</sub> (light) = 0.16 mg /L<br>LC <sub>50</sub> (dark) = 4.63 mg /L | 4         |
|                  | 27.5                          | 14.2-64.6                  | N/A      | N/A                    | human lung epithelial cells                                                 | not cytotoxic at any concentration up to 100 µg/mL                            | 5         |
|                  | N/A                           | 91                         | N/A      | + 48.8                 | in human peripheral blood lymphocytes <sup>4</sup> or BEAS-2B/ IMR-90 cells | no significant induction of DNA damage based on the comet assay               | 6         |
|                  | 25                            | N/A                        | 371±323  | -18 ± 4.5              | <i>S. oneidensis</i>                                                        | no significant change in cell survival with increasing concentration          | 7         |
|                  | < 25                          | N/A                        | 185 ± 40 | N/A                    | waste activated sludge                                                      | doses up to no inhibitory effect at 150 mg/ g-TSS                             | 8         |
|                  | 50                            | N/A                        | N/A      | -21                    | <i>B. subtilis</i> , <i>E. coli</i> and <i>P. fluorescens</i>               | did not affect bacterial populations                                          | 9         |
| 66               | N/A                           | 330                        | N/A      | <i>B. subtilis</i> and | resulting in 75% growth reduction with 1000 ppm                             | 10                                                                            |           |

|       |       |     |     |                                        |                                                                                                                                                                  |    |
|-------|-------|-----|-----|----------------------------------------|------------------------------------------------------------------------------------------------------------------------------------------------------------------|----|
|       |       |     |     | <i>E. coli</i>                         | resulting in 72% growth reduction with<br>5000 ppm                                                                                                               |    |
|       |       |     |     | <i>Vibrio fischeri</i>                 | EC <sub>50</sub> > 20000 mg/L                                                                                                                                    |    |
| 25-70 | N/A   | N/A | N/A | <i>Daphnia magna</i>                   | LC <sub>50</sub> ~ 20000 mg/L                                                                                                                                    | 11 |
|       |       |     |     | <i>Thamnocephalus platyurus</i>        | LC <sub>50</sub> > 20000 mg/L                                                                                                                                    |    |
| 25-70 | N/A   | N/A | N/A | <i>Pseudokirchneriella subcapitata</i> | EC <sub>50</sub> = 5.83 mg Ti/L                                                                                                                                  | 2  |
| 50-70 | N/A   | N/A | N/A | algae <i>P. subcapitata</i>            | EC <sub>50</sub> ~ 0.04 mg Zn/L                                                                                                                                  | 2  |
|       |       |     |     | <i>E. coli</i>                         | EC <sub>50</sub> = 115.7 mg/L                                                                                                                                    |    |
| 50-70 | N/A   | N/A | N/A | <i>B. subtilis</i>                     | EC <sub>50</sub> = 85.8 mg/L                                                                                                                                     | 12 |
|       |       |     |     | <i>S. aureus</i>                       | EC <sub>50</sub> >125 mg/L                                                                                                                                       |    |
| 13    | N/A   | N/A | N/A | <i>E. coli</i>                         | complete inhibition of <i>E. coli</i> growth at<br>concentrations > 3.4mM                                                                                        | 13 |
|       |       |     |     | <i>S. aureus</i>                       | growth of <i>S. aureus</i> was completely<br>inhibited at concentrations > 1mM                                                                                   |    |
| ZnO   | 100   | N/A | N/A | Mouse macrophage<br>(Ana-1) cell line  | IC <sub>50</sub> = 35.26 mg/L                                                                                                                                    | 14 |
|       | 30    | N/A | N/A | Mouse macrophage<br>(Ana-2) cell line  | IC <sub>50</sub> = 32.43 mg/L                                                                                                                                    | 13 |
|       | 10-30 | N/A | N/A | Mouse macrophage<br>(Ana-3) cell line  | IC <sub>50</sub> = 24.84 mg/L                                                                                                                                    | 13 |
|       | 50-70 | N/A | N/A | <i>S. cerevisiae</i> S288C             | EC <sub>50</sub> = 121–134 mg ZnO/L                                                                                                                              | 12 |
|       | 150   | N/A | N/A | <i>S. agalactiae</i>                   | 0.12 M caused more than 95% inhibition<br>of bacterial growth, 1.2 × 10 <sup>-3</sup> M, a slight<br>decrease in the number of bacteria<br>colonies was detected | 15 |

|       |        |          |            |                                                               |                                                                                                                                              |    |
|-------|--------|----------|------------|---------------------------------------------------------------|----------------------------------------------------------------------------------------------------------------------------------------------|----|
|       |        |          |            | <i>S. aureus</i>                                              | $6 \times 10^{-4}$ M, a slight decrease in the number of bacteria colonies was detected                                                      |    |
| N/A   | 19 ± 7 | N/A      | -2.9 ± 0.3 | <i>E. coli</i>                                                | the bacterial mortality at ZnO NPs concentration of 50 mg/L are 40% in Tap water, 20% in Xixi River and West Lake, and 10% in Qiantang River | 16 |
| N/A   | 47-106 | N/A      | N/A        | <i>E. coli</i>                                                | LC <sub>50</sub> (light) = 0.048 mg/L<br>LC <sub>50</sub> (dark) = 0.13 mg/L                                                                 | 4  |
| 25    | N/A    | N/A      | N/A        | human myeloblastic leukemia cells (HL60)                      | CC <sub>50</sub> = 52.80 µg/mL                                                                                                               | 17 |
| 42    | N/A    | 111±44   | - 6.14     | normal peripheral blood mononuclear cells (PBMCs)             | CC <sub>50</sub> = 741.82 µg/mL                                                                                                              | 18 |
| <100  | N/A    | 140 ± 20 | N/A        | human umbilical vein endothelial cells (HUVECs)               | decreased the cellular viability to about 40% of the control at 240 µM                                                                       | 8  |
| 20    | N/A    | N/A      | -5         | waste activated sludge                                        | inhibitory effect with its dosages increased                                                                                                 | 9  |
| 67    | N/A    | 480      | N/A        | <i>B. subtilis</i> , <i>E. coli</i> and <i>P. fluorescens</i> | 100% mortality                                                                                                                               | 10 |
| 50-70 | N/A    | N/A      | N/A        | <i>B. subtilis</i>                                            | 90% growth reduction at 10 ppm                                                                                                               | 11 |
|       |        |          |            | <i>E. coli</i>                                                | 48% growth reduction at 1000 ppm                                                                                                             |    |
|       |        |          |            | <i>Vibrio fischeri</i>                                        | EC <sub>50</sub> = 1.9 ± 0.2 mg/L                                                                                                            |    |
|       |        |          |            | <i>Daphnia magna</i>                                          | LC <sub>50</sub> = 3.2 ± 1.3 mg/L                                                                                                            |    |
|       |        |          |            | <i>Thamnocephalus platyurus</i>                               | LC <sub>50</sub> = 0.18 ± 0.03 mg/L                                                                                                          |    |
| 50-70 | N/A    | N/A      | N/A        | <i>Pseudokirchneriella subcapitata</i>                        | EC <sub>50</sub> ~ 0.04 mg Zn/L                                                                                                              | 2  |

|     |              |              |               |                                      |                                                                                                                                              |                                                                                  |    |
|-----|--------------|--------------|---------------|--------------------------------------|----------------------------------------------------------------------------------------------------------------------------------------------|----------------------------------------------------------------------------------|----|
| Ag  | 20           | 20.3 ± 1.9   | 27.0 ± 10.8   | - 47.1 ± 1.9                         | RAW 264.7                                                                                                                                    | EC <sub>20</sub> = 7 mg/L                                                        |    |
|     |              |              |               |                                      | L929 cells                                                                                                                                   | EC <sub>20</sub> = 2.8 mg/L                                                      |    |
|     | 80           | 79.8 ± 5.1   | 79 ± 25.2     | - 49.7 ± 1.8                         | RAW 264.7                                                                                                                                    | EC <sub>20</sub> = 38 mg/L                                                       | 19 |
|     |              |              |               |                                      | L929 cells                                                                                                                                   | EC <sub>20</sub> = 17 mg/L                                                       |    |
|     | 110          | 112.6 ± 7.8  | 111.6 ± 29.9  | - 54.5 ± 1.8                         | RAW 264.7                                                                                                                                    | EC <sub>20</sub> = 100 mg/L                                                      |    |
|     |              |              |               |                                      | L929 cells                                                                                                                                   | EC <sub>20</sub> > 12 mg/L                                                       |    |
|     | 40           | 46 ± 21      | N/A           | -13.6                                | human mesenchymal stem cells (hMSCs)                                                                                                         | DNA damage after 1, 3, and 24 h at 0.1 mg/L                                      | 20 |
|     | 15           |              |               |                                      | rat liver derived cell line (BRL 3A)                                                                                                         | EC <sub>50</sub> = 24 ± 7.25 mg/L                                                | 21 |
|     | 100          | N/A          | N/A           | N/A                                  |                                                                                                                                              | EC <sub>50</sub> = 19 ± 5.2 mg/L                                                 |    |
|     | less than 10 | N/A          | N/A           | N/A                                  | human hepatoma cells                                                                                                                         | IC <sub>50</sub> = 3.38 ± 0.55 µg/mL                                             | 22 |
|     | N/A          | 50 ± 20      | 85            | -30                                  | Human mesenchymal stem cells                                                                                                                 | 57% growth reduction for 20 µg/mL, and 100% growth reduction for 25 µg/mL        | 23 |
|     | 9-21         | N/A          | N/A           | N/A                                  | Nitrifying Bacteria                                                                                                                          | EC <sub>50</sub> = 0.14 mg/L                                                     | 24 |
|     | 7-10         | N/A          | N/A           | N/A                                  | human hepatoma cell line, HepG2                                                                                                              | cytotoxicity at higher doses (>1.0 mg/L)                                         | 25 |
|     | 10-20        | N/A          | N/A           | N/A                                  | ammonia-oxidizing bacteria                                                                                                                   | ammonoxidation inhibition by nano-Ag was dependant on the level of concentration | 26 |
| N/A | 57 ± 20      | 143 ± 9      | -44.7 ± 1.6   | Natural Estuarine Plankton Community | the growth rates of both phytoplankton and bacterioplankton populations were significantly reduced by Ag NPs at concentrations of ≥ 500 µg/L | 27                                                                               |    |
| 25  | N/A          | 76.65 ± 5.73 | - 4.76 ± 0.19 | HEK293T cell                         | IC <sub>50</sub> = 30 µg/mL                                                                                                                  | 28                                                                               |    |

|     |       |          |           |           |                             |                                                                                                                                                                    |    |
|-----|-------|----------|-----------|-----------|-----------------------------|--------------------------------------------------------------------------------------------------------------------------------------------------------------------|----|
|     | N/A   | 54.3±5.3 | 101.9±3.3 | - 9.9±0.4 | the HaCaT cell              | LD <sub>50</sub> = 54.3 µg/mL                                                                                                                                      | 29 |
|     | 100   |          |           | -37.3     | the human LoVo cell line    | the 100 nm nanoparticles exerted indirect effects via serine/threonine protein kinase (PAK), mitogen-activated protein kinase (MAPK), and phosphatase 2A pathways, | 30 |
|     | 20    | N/A      | N/A       |           |                             | the 20 nm nanoparticles induced direct effects on cellular stress, including generation of reactive oxygen species and protein carbonylation.                      |    |
|     | 10    |          |           |           |                             | 10 nm AgNPs induced more apoptotic cells than the larger particles (i.e., 50 and 100 nm).                                                                          |    |
|     | 50    | N/A      | N/A       | N/A       | MC3T3-E1 cells              |                                                                                                                                                                    | 31 |
|     | 100   |          |           |           |                             |                                                                                                                                                                    |    |
|     | 30    | N/A      | N/A       | N/A       | algae <i>P. subcapitata</i> | EC <sub>50</sub> = 0.71 mg Cu/L                                                                                                                                    | 2  |
|     |       |          |           |           | <i>E. coli</i>              | EC <sub>50</sub> = 28.6 mg/L                                                                                                                                       |    |
|     | 20-30 | N/A      | N/A       | N/A       | <i>B. subtilis</i>          | EC <sub>50</sub> = 61.1 mg/L                                                                                                                                       | 12 |
|     |       |          |           |           | <i>S. aureus</i>            | EC <sub>50</sub> = 65.9 mg/L                                                                                                                                       |    |
|     | 30    | N/A      | N/A       | N/A       | <i>S. cerevisiae</i> S288C  | EC <sub>50</sub> = 13.4 mg/L                                                                                                                                       | 3  |
| CuO |       |          |           |           |                             | the formation of superoxide anions, hydrogen peroxide and single-stranded DNA already at very low sub-toxic levels (0.1 mg Cu/L)                                   |    |
|     | 30    | N/A      | 192.5     | N/A       | <i>E. coli</i> biosensor    |                                                                                                                                                                    | 32 |
|     | N/A   | 92 ± 12  | N/A       | N/A       | activated sludge            | The sludge flocs were unstable after exposure to CuO NPs (50 mg/L)                                                                                                 | 33 |
|     | N/A   | 17-45    | N/A       | N/A       | <i>E. coli</i>              | LC <sub>50</sub> (light) = 1.68 mg/L<br>LC <sub>50</sub> (dark) = 58.3 mg/L                                                                                        | 4  |

|                                |                 |                                     |            |             |                                                                       |                                                                                                                                                                                                             |    |
|--------------------------------|-----------------|-------------------------------------|------------|-------------|-----------------------------------------------------------------------|-------------------------------------------------------------------------------------------------------------------------------------------------------------------------------------------------------------|----|
|                                | 30              | N/A                                 | 194 ± 16.9 | 31.9 ± 7.31 | Yeast <i>S. cerevisiae</i><br>BY4741                                  | IC <sub>50</sub> = 4.8 mg/L in DI<br>IC <sub>50</sub> = 643 mg/L in YPD                                                                                                                                     | 34 |
|                                | 30              | N/A                                 | N/A        | N/A         | <i>Vibrio fischeri</i><br><i>Daphnia magna</i>                        | EC <sub>50</sub> = 79 ± 27 mg/L<br>LC <sub>50</sub> = 3.2 ± 1.6 mg/L                                                                                                                                        | 11 |
|                                | 30              | N/A                                 | N/A        | N/A         | <i>Thamnocephalus platyurus</i><br>Pseudokirchneriella<br>subcapitata | LC <sub>50</sub> = 2.1 ± 0.5 mg/L<br>EC <sub>50</sub> = 0.71 mg Cu/L                                                                                                                                        | 2  |
| NiO                            | 10 - 20         | N/A                                 | N/A        | N/A         | <i>E. coli</i><br><i>B. subtilis</i><br><i>S. aureus</i>              | EC <sub>50</sub> = 160.2 mg/L<br>EC <sub>50</sub> = 121.9 mg/L<br>EC <sub>50</sub> = 121.1 mg/L                                                                                                             | 12 |
| Sb <sub>2</sub> O <sub>3</sub> | 90 - 210        | N/A                                 | N/A        | N/A         | <i>E. coli</i> Bacillus<br>subtilis, and<br>Streptococcus<br>aureus   | EC <sub>50</sub> = 265.5, 144.7, 324 mg L <sup>-1</sup>                                                                                                                                                     | 12 |
|                                | 150             | N/A                                 | N/A        | N/A         | rat liver derived cell<br>line (BRL 3A)                               | EC <sub>50</sub> = 174.68 ± 26 mg/L<br>EC <sub>50</sub> = 171.58 ± 25 mg/L                                                                                                                                  | 21 |
| MoO <sub>3</sub>               | 30              | 400nm long,<br>100 - 200<br>nm wide | N/A        | N/A         | iMCF-7                                                                | IC <sub>50</sub> = 275 µg/mL                                                                                                                                                                                | 35 |
|                                | 7               | N/A                                 | 15         | N/A         |                                                                       | DNA damage                                                                                                                                                                                                  | 36 |
|                                | N/A             | 20 ± 3                              | N/A        | N/A         |                                                                       | cell membrane damage                                                                                                                                                                                        | 37 |
| CeO <sub>2</sub>               | less than<br>25 | N/A                                 | N/A        | N/A         | anaerobic granule<br>floculent sludge                                 | a reduction of 15 - 19% for the flocculent<br>sludge at the dosage of 5, 50 and 150 mg<br>CeO <sub>2</sub> NPs/g-VSS<br>a reduction of 35% for the granular<br>sludge at 150 mg CeO <sub>2</sub> NPs/g-VSS. | 38 |

|                                                   |         |                                                                                                             |           |        |                                                 |                                                                                               |    |
|---------------------------------------------------|---------|-------------------------------------------------------------------------------------------------------------|-----------|--------|-------------------------------------------------|-----------------------------------------------------------------------------------------------|----|
|                                                   | N/A     | 10 - 20                                                                                                     | N/A       | N/A    | freshwater alga<br><i>(P. subcapitata)</i>      | EC <sub>50</sub> = 10.3 ± 1.7 mg/L                                                            | 39 |
|                                                   | 7       | N/A                                                                                                         | N/A       | N/A    | <i>E. coli</i>                                  | lethal                                                                                        | 40 |
|                                                   | 33      | N/A                                                                                                         | 125 ± 38  | - 6.64 | human umbilical vein endothelial cells (HUVECs) | CeO <sub>2</sub> NPs did not show toxic effects even with doubling of tested dosage to 480 µM | 18 |
| Au                                                | 10 - 20 | N/A                                                                                                         | N/A       | N/A    | ammonia-oxidizing bacteria                      | no significant effect on ammoxidation                                                         | 26 |
| Gold nanorods                                     | N/A     | 18 × 40                                                                                                     | N/A       | N/A    | in HeLa cells                                   | less toxicity                                                                                 | 41 |
| Co <sub>3</sub> O <sub>4</sub>                    | N/A     | 51-132                                                                                                      | N/A       | N/A    | <i>E. coli</i>                                  | LC <sub>50</sub> (light) = 35.06 mg/L<br>LC <sub>50</sub> (dark) = 55.56 mg/L                 | 4  |
| graphene oxide (GO)                               | N/A     | The lateral length and thickness of GO were approximately 0.5–5 µm and 0.8–1.2 nm                           | 295 - 825 |        |                                                 | did not show significant differences compared with the control at 10 mg/L GO                  |    |
| carboxyl single-walled carbon nanotubes (C-SWCNT) | N/A     | The outer diameter, inner diameter and length of C-SWCNT were approximately 1–2 nm, 0.8– 1.6, and 0.5–3 µm, | 396 - 712 | N/A    | <i>Chlorella vulgaris</i>                       | with 0.8–28.3% inhibition at 97 h                                                             | 42 |

|                                |       |                                                                               |              |        |                                                  |                                                                                                                      |    |
|--------------------------------|-------|-------------------------------------------------------------------------------|--------------|--------|--------------------------------------------------|----------------------------------------------------------------------------------------------------------------------|----|
| SWCNT                          | N/A   | an average outer diameter of 1.2 nm, lengths in the range of 10 to 20 $\mu$ m | N/A          | N/A    | <i>E. coli</i> cell growth and biofilm formation | biofilms in aquatic systems can potentially recover from the toxic effects of SWNTs after long exposure times (48 h) | 43 |
|                                | N/A   | >150 nm long                                                                  | N/A          | N/A    | RAW 264.7, a macrophage-like cell line.          | single-walled carbon nanotubes, and amorphous silica resulted in a lower toxicity                                    | 44 |
| Silica                         | N/A   | N/A                                                                           | N/A          | N/A    | in A549 (a human lung cell line)                 | no differences in the induction of pulmonary inflammation and lactate dehydrogenase                                  | 45 |
| SiO <sub>2</sub>               | 10–20 | N/A                                                                           | 110 $\pm$ 40 | N/A    | waste activated sludge                           | no inhibitory effect                                                                                                 | 8  |
| porous SiO <sub>2</sub>        | N/A   | 25 $\pm$ 4                                                                    | N/A          | -16.94 | Immune Cells                                     | do not influence mast cell viability                                                                                 | 46 |
| nonporous SiO <sub>2</sub>     | N/A   | 11 $\pm$ 5                                                                    | N/A          | -13.58 |                                                  | cell viability drops significantly to 72%                                                                            |    |
| SiO <sub>2</sub>               | 20    | N/A                                                                           | N/A          | +35    | <i>B. subtilis</i>                               | killed 40% of <i>B. subtilis</i>                                                                                     |    |
|                                |       |                                                                               |              |        | <i>E. coli</i>                                   | killed 58% of <i>E. coli</i>                                                                                         | 9  |
|                                |       |                                                                               |              |        | <i>P. fluorescens</i>                            | killed 70% of <i>P. fluorescens</i>                                                                                  |    |
| SiO <sub>2</sub>               | 14    | N/A                                                                           | 205          | N/A    | <i>B. subtilis</i>                               | least toxic                                                                                                          | 10 |
|                                | 30    |                                                                               |              |        | <i>E. coli</i>                                   |                                                                                                                      |    |
| Fe <sub>3</sub> O <sub>4</sub> | 70    | N/A                                                                           | N/A          | N/A    | rat liver derived cell line (BRL 3A)             | EC <sub>50</sub> > 250 mg/L                                                                                          | 21 |
| Al                             | 103   | N/A                                                                           | N/A          | N/A    | rat liver derived cell line (BRL 3A)             | EC <sub>50</sub> > 250 mg/L                                                                                          | 21 |
| Al <sub>2</sub> O <sub>3</sub> | 60    | N/A                                                                           | N/A          | + 30   | <i>B. subtilis</i>                               | a mortality rate of 57% to <i>B. subtilis</i>                                                                        | 9  |



|                                |                                  |                                  |                             |       |                         |                                                  |    |
|--------------------------------|----------------------------------|----------------------------------|-----------------------------|-------|-------------------------|--------------------------------------------------|----|
|                                |                                  |                                  |                             |       | <i>E. coli</i>          | a mortality rate of 36% to <i>E. coli</i>        |    |
|                                |                                  |                                  |                             |       | <i>P. fluorescens</i>   | a mortality rate of 70% to <i>P. fluorescens</i> |    |
|                                | < 50                             | N/A                              | 130 ± 30                    | N/A   | waste activated sludge  | no inhibitory effect                             | 8  |
|                                | N/A                              | 10-70                            | 62-65 nm and 78-88 nm       | N/A   | <i>B. licheniformis</i> | 17% decrease in cell viability at 1µg/mL         | 48 |
| Fe <sub>2</sub> O <sub>3</sub> | 29                               | 30-60                            | 1580                        | -17.3 | the A549 Cell Line      | low toxicity was observed                        | 47 |
| Fe <sub>3</sub> O <sub>4</sub> | 29-30                            | 20-40                            | < 200                       | 1.8   | the A549 Cell Line      | no toxicity was observed                         | 47 |
| carbon                         | < 30                             | 20-40                            | 210                         | 6.9   | the A549 Cell Line      | no toxicity was observed                         | 47 |
| carbon nanotubes               | 110-170× ( 5-9×10 <sup>3</sup> ) | 100-200× ( 3-7×10 <sup>3</sup> ) | 300× ( 69×10 <sup>3</sup> ) | -45.4 | the A549 Cell Line      | a nonsignificant increase in nonviable cells     | 47 |

## References

- 1 K. Hund-Rinke and M. Simon, *Environmental Science and Pollution Research*, 2006, **13**, 225-232.
- 2 V. Aruoja, H. C. Dubourguier, K. Kasemets and A. Kahru, *Science of the total environment*, 2009, **407**, 1461-1468.
- 3 K. Kasemets, A. Ivask, H. C. Dubourguier and A. Kahru, *Toxicology in vitro*, 2009, **23**, 1116-1122.
- 4 T. P. Dasari, K. Pathakoti and H.-M. Hwang, *Journal of Environmental Sciences*, 2013, **25**, 882-888.
- 5 R. Y. Prasad, K. Wallace, K. M. Daniel, A. H. Tennant, R. M. Zucker, J. Strickland, K. Dreher, A. D. Kligerman, C. F. Blackman and D. M. DeMarini, *ACS nano*, 2013, **7**, 1929-1942.

- 6 K. Bhattacharya, M. Davoren, J. Boertz, R. P. Schins, E. Hoffmann and E. Dopp, *Particle and Fibre Toxicology*, 2009, **6**, 1.
- 7 M. A. Maurer-Jones, I. L. Gunsolus, B. M. Meyer, C. J. Christenson and C. L. Haynes, *Analytical chemistry*, 2013, **85**, 5810-5818.
- 8 H. Mu, Y. Chen and N. Xiao, *Bioresource technology*, 2011, **102**, 10305-10311.
- 9 W. Jiang, H. Mashayekhi and B. Xing, *Environmental pollution*, 2009, **157**, 1619-1625.
- 10 L. K. Adams, D. Y. Lyon and P. J. Alvarez, *Water research*, 2006, **40**, 3527-3532.
- 11 M. Heinlaan, A. Ivask, I. Blinova, H. C. Dubourguier and A. Kahru, *Chemosphere*, 2008, **71**, 1308-1316.
- 12 Y. W. Baek and Y. J. An, *Science of the Total Environment*, 2011, **409**, 1603-1608.
- 13 K. M. Reddy, K. Feris, J. Bell, D. G. Wingett, C. Hanley and A. Punnoose, *Applied physics letters*, 2007, **90**, 213902.
- 14 W. Song, J. Zhang, J. Guo, J. Zhang, F. Ding, L. Li and Z. Sun, *Toxicology letters*, 2010, **199**, 389-397.
- 15 Z. Huang, X. Zheng, D. Yan, G. Yin, X. Liao, Y. Kang, Y. Yao, D. Huang and B. Hao, *Langmuir*, 2008, **24**, 4140-4144.
- 16 M. Li, D. Lin and L. Zhu, *Environmental pollution*, 2013, **173**, 97-102.
- 17 M. Premanathan, K. Karthikeyan, K. Jeyasubramanian and G. Manivannan, *Nanomedicine: Nanotechnology, Biology and Medicine*, 2011, **7**, 184-192.
- 18 R. Chen, L. Huo, X. Shi, R. Bai, Z. Zhang, Y. Zhao, Y. Chang and C. Chen, *ACS nano*, 2014, **8**, 2562-2574.
- 19 M. V. Park, A. M. Neigh, J. P. Vermeulen, L. J. de la Fonteyne, H. W. Verharen, J. J. Briedé, H. van Loveren and W. H. de Jong, *Biomaterials*, 2011, **32**, 9810-9817.
- 20 S. Hackenberg, A. Scherzed, M. Kessler, S. Hummel, A. Technau, K. Froelich, C. Ginzkey, C. Koehler, R. Hagen and N. Kleinsasser, *Toxicology letters*, 2011, **201**, 27-33.
- 21 S. Hussain, K. Hess, J. Gearhart, K. Geiss and J. Schlager, *Toxicology in vitro*, 2005, **19**, 975-983.
- 22 S. Kim, J. E. Choi, J. Choi, K. H. Chung, K. Park, J. Yi and D. Y. Ryu, *Toxicology in vitro*, 2009, **23**, 1076-1084.

- 23 S. Kittler, C. Greulich, J. Diendorf, M. Koller and M. Epple, *Chemistry of Materials*, 2010, **22**, 4548-4554. O. Choi and Z. Hu, *Environmental science & technology*, 2008, **42**, 4583-4588.
- 24 O. Choi and Z. Hu, *Environmental science & technology*, 2008, **42**, 4583-4588.
- 25 K. Kawata, M. Osawa and S. Okabe, *Environmental science & technology*, 2009, **43**, 6046-6051.
- 26 Z. Luo, Z. Chen, Z. Qiu, Y. Li, G. Du Laing, A. Liu and C. Yan, *Chemosphere*, 2015, **120**, 737-742.
- 27 M. S. Baptista, R. J. Miller, E. R. Halewood, S. K. Hanna, C. M. R. Almeida, V. M. Vasconcelos, A. A. Keller and H. S. Lenihan, *Environmental science & technology*, 2015, **49**, 12968-12974.
- 28 Y. Chen, Z. Wang, M. Xu, X. Wang, R. Liu, Q. Liu, Z. Zhang, T. Xia, J. Zhao and G. Jiang, *ACS nano*, 2014, **8**, 5813-5825.
- 29 K. K. Comfort, L. K. Braydich-Stolle, E. I. Maurer and S. M. Hussain, *ACS nano*, 2014, **8**, 3260-3271.
- 30 T. Verano-Braga, R. Miethling-Graff, K. Wojdyla, A. Rogowska-Wrzesinska, J. R. Brewer, H. Erdmann and F. Kjeldsen, *ACS nano*, 2014, **8**, 2161-2175.
- 31 T. H. Kim, M. Kim, H. S. Park, U. S. Shin, M. S. Gong and H. W. Kim, *Journal of Biomedical Materials Research Part A*, 2012, **100**, 1033-1043.
- 32 O. Bondarenko, A. Ivask, A. Kähkönen and A. Kahru, *Environmental pollution*, 2012, **169**, 81-89.
- 33 J. Hou, L. Miao, C. Wang, P. Wang, Y. Ao and B. Lv, *Bioresource technology*, 2015, **176**, 65-70.
- 34 K. Kasemets, S. Suppi, K. Künnis-Beres and A. Kahru, *Chemical research in toxicology*, 2013, **26**, 356-367.
- 35 T. Anh Tran, K. Krishnamoorthy, Y. W. Song, S. K. Cho and S. J. Kim, *ACS applied materials & interfaces*, 2014, **6**, 2980-2986.
- 36 M. Auffan, J. Rose, T. Orsiere, M. De Meo, A. Thill, O. Zeyons, O. Proux, A. Masion, P. Chaurand and O. Spalla, *Nanotoxicology*, 2009, **3**, 161-171.
- 37 W. Lin, Y. w. Huang, X. D. Zhou and Y. Ma, *International journal of toxicology*, 2006, **25**, 451-457.

- 38 J. Ma, X. Quan, X. Si and Y. Wu, *Bioresource technology*, 2013, **149**, 346-352.
- 39 N. J. Rogers, N. M. Franklin, S. C. Apte, G. E. Batley, B. M. Angel, J. R. Lead and M. Baalousha, *Environmental Chemistry*, 2010, **7**, 50-60.
- 40 A. Thill, O. Zeyons, O. Spalla, F. Chauvat, J. Rose, M. Auffan and A. M. Flank, *Environmental science & technology*, 2006, **40**, 6151-6156.
- 41 T. S. Hauck, A. A. Ghazani and W. C. Chan, *Small*, 2008, **4**, 153-159.
- 42 X. Hu, S. Ouyang, L. Mu, J. An and Q. Zhou, *Environmental science & technology*, 2015, **49**, 10825-10833.
- 43 D. F. Rodrigues and M. Elimelech, *Environmental science & technology*, 2010, **44**, 4583-4589.
- 44 D. Dutta, S. K. Sundaram, J. G. Teeguarden, B. J. Riley, L. S. Fifield, J. M. Jacobs, S. R. Addleman, G. A. Kaysen, B. M. Moudgil and T. J. Weber, *Toxicological Sciences*, 2007, **100**, 303-315.
- 45 T. M. Sager, D. W. Porter, V. A. Robinson, W. G. Lindsley, D. E. Schwegler-Berry and V. Castranova, *Nanotoxicology*, 2007, **1**, 118-129.
- 46 M. A. Maurer-Jones, Y. S. Lin and C. L. Haynes, *ACS nano*, 2010, **4**, 3363-3373.
- 47 H. L. Karlsson, P. Cronholm, J. Gustafsson and L. Moller, *Chemical research in toxicology*, 2008, **21**, 1726-1732.
- 48 S. Pakrashi, S. Dalai, D. Sabat, S. Singh, N. Chandrasekaran and A. Mukherjee, *Chemical research in toxicology*, 2011, **24**, 1899-1904.
